# Supplementary material for: Potential Probiotic Properties of Exopolysaccharide-Producing Lacticaseibacillus paracasei EPS DA-BACS and Prebiotic Activity of Its Exopolysaccharide
Source: MDPI journal article supplement (doi:10.3390/microorganisms10122431), 2022-12-08
Supplement: s1 [file s1]

## Supplementary data

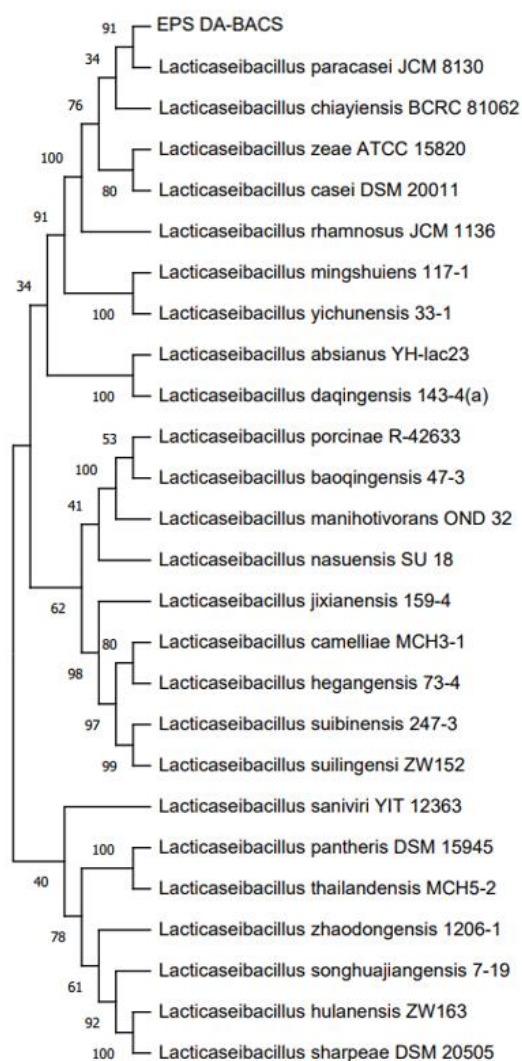

Figure S1. Phylogenetic tree of *Lactcaseibacillus paracasei* EPS DA-BACS generated by neighbor-joining method based on the sequence of 16S rRNA gene.

**Table S1. Carbohydrate utilization of *Lacticaseibacillus paracasei* EPS DA-BACS analyzed by API CHL 50 kit.**

| Carbohydrate                        | strains     |             | Carbohydrate                | strains     |             |
|-------------------------------------|-------------|-------------|-----------------------------|-------------|-------------|
|                                     | EPS DA-BACS | KCCM 409915 |                             | EPS DA-BACS | KCCM 409915 |
| Glycerol                            | -           | -           | Salicin                     | +           | +           |
| Erythritol                          | -           | -           | D-Cellobiose                | +           | +           |
| D-Arabinose                         | -           | -           | D-Maltose                   | +           | -           |
| L-Arabinose                         | -           | -           | D-Lactose (bovine origin)   | +           | +           |
| D-Ribose                            | +           | +           | D-Melibiose                 | -           | -           |
| D-Xylose                            | -           | -           | D-Saccharose (sucrose)      | -           | -           |
| L-Xylose                            | -           | -           | D-Trehalose                 | +           | +           |
| D-Adonitol                          | -           | -           | Inulin                      | -           | -           |
| Methyl- $\beta$ -D-Xylopyranoside   | -           | -           | D-Melezitose                | -           | +           |
| D-Galactose                         | +           | +           | D-Raffinose                 | -           | -           |
| D-Glucose                           | +           | +           | Amidon (starch)             | -           | -           |
| D-Fructose                          | +           | +           | Glycogen                    | -           | -           |
| D-Mannose                           | +           | +           | Xylitol                     | -           | -           |
| L-sorbose                           | +           | -           | Gentiobiose                 | +           | +           |
| L-Rhamnose                          | -           | -           | D-Turanose                  | +           | +           |
| Ducitol                             | -           | -           | D-Lyxose                    | -           | -           |
| Inositol                            | -           | -           | D-Tagatose                  | +           | +           |
| D-Mannitol                          | +           | +           | D-Fucose                    | -           | -           |
| D-Sorbitol                          | +           | -           | L-Fucose                    | -           | -           |
| Methyl- $\alpha$ -D-Mannopyranoside | -           | -           | D-Arabitol                  | -           | -           |
| Methyl- $\alpha$ -D-Glucopyranoside | -           | -           | L-Arabitol                  | -           | -           |
| N-Acetyl Glucosamine                | +           | +           | Potassium Gluconate         | +           | +           |
| Amygdalin                           | +           | -           | Potassium 2-Ketoglucuronate | -           | -           |
| Arbutin                             | +           | -           | Potassium 5-Ketoglucuronate | -           | -           |
| Esculin ferric citrate              | +           | +           |                             |             |             |

*L. paracasei* KCCM 40995 was used as a reference strain.

Table S2. Antimicrobial activity of twelve *Lacticaseibacillus paracasei* strains

|                          | KCTC<br>3169 | KCTC<br>13090 | KCTC<br>3165 | KCTC<br>3189 | KCTC<br>5546 | KCTC<br>3510 | KCTC<br>5058 | KCTC<br>3074 | KCCM<br>40995 | KCCM<br>42830 | KCCM<br>32822 | KCCM<br>41246 |
|--------------------------|--------------|---------------|--------------|--------------|--------------|--------------|--------------|--------------|---------------|---------------|---------------|---------------|
| <i>Bacillus subtilis</i> | -            | -             | -            | -            | -            | -            | +            | -            | -             | -             | -             | -             |
| <i>P. aeruginosa</i>     | -            | -             | -            | -            | -            | -            | +            | +            | -             | -             | -             | -             |
| <i>S. aureus</i>         | +            | +             | +            | +            | +            | +            | +            | +            | +             | +             | +             | +             |
| <i>E. coli</i>           | -            | -             | -            | -            | -            | +            | +            | +            | -             | -             | -             | +             |

+, > 0.1 OD<sub>600</sub>; -, < 0.1 OD<sub>600</sub>
